# Supplementary material for: Cardiac pericytes are necessary for coronary vasculature integrity and cardiomyocyte differentiation
Source: bioRxiv or medRxiv preprint supplement (doi:10.1101/2022.08.29.505703), 2022-09-01
Supplement: Supplementary file [file media-1.pdf]

## **Supplementary data**

## Supplemental tables

### A/ List of primary antibodies

| Target antigen           | Vendor or Source          | Catalog #    | Working concentration |
|--------------------------|---------------------------|--------------|-----------------------|
| mouse PECAM-1 (CD31)     | BMA Biomedicals           | T-2001       | 2 µg/mL               |
| mouse PODXL              | R&D systems               | AF1556       | 4 µg/mL               |
| mouse Cy3-anti-smα-actin | Sigma                     | C6198        | 5 µg/mL               |
| mouse NG2                | Chemicon                  | AB 5320      |                       |
| mouse ACTN2              | Sigma                     | A 2172       |                       |
| mouse VIM                | Cell signaling technology | 5741         |                       |
| mouse ICAM-1 (CD54)      | BD Pharmingen             | 550287       | 2.5 µg/mL             |
| mouse VCAM-1             | Invitrogen                | 14-1061-82   |                       |
| mouse CDH5               | R&D systems               | AF1002       |                       |
| mouse FGB                | Abcam                     | ab227063     |                       |
| mouse COL1A1             | Abcam                     | ab21285      |                       |
| mouse CX43               | Sigma                     | C6219        |                       |
| mouse CD41               | Proteintech               | 18308-1-AP   | 3.5 µg/mL             |
| mouse Myh7               | Atlas antibodies          | HPA001239    | 1 µg/mL               |
| mouse Desmin             | DB Biotech                | DB148-0.1    | 0.5 µg/mL             |
| mouse CD45               | BD Pharmingen             | 550539       | 0.625 µg/mL           |
| mouse CD68               | Biolegend                 | 137001       | 5 µg/mL               |
| mouse CD3                | Santa-Cruz Biotechnology  | sc-1127      |                       |
| mouse B220               | R&D systems               | MAB1217      |                       |
|                          |                           |              |                       |
| GFP                      | Novus                     | NB100-1770SS |                       |
| GFP                      | Invitrogen                | A6455        |                       |
|                          |                           |              |                       |
|                          |                           |              |                       |
|                          |                           |              |                       |
|                          |                           |              |                       |
| mouse ATP2A2             | Badrilla                  | A010-80      |                       |
| phospho-PLN (Ser16)      | Badrilla                  | A010-12      |                       |
| phospho-PLN (Thr17)      | Badrilla                  | A010-13      |                       |
| total-PLN                | Badrilla                  | A010-14      |                       |
| phospho-RYR2 (Ser2814)   | Badrilla                  | A010-31      |                       |
| α-tubulin                | Sigma                     | T5168        |                       |
| human CDH5               | Cell signaling technology | 2500         |                       |
| human ICAM-1             | Santa-Cruz Biotechnology  | sc-8439      |                       |

B/ List of secondary antibodies

| <b>Target antigen</b> | <b>Conjugate</b> | <b>Vendor or Source</b>   | <b>Catalog #</b> | <b>Working concentration</b> |
|-----------------------|------------------|---------------------------|------------------|------------------------------|
| Rat IgG               | Biotin           | Jackson<br>ImmunoResearch | 712-065-153      | Dilution 1/500               |
| Rabbit                | Biotin           | Jackson<br>ImmunoResearch | 711-065-152      | Dilution 1/500               |
| Goat IgG              | Alexa Fluor 568  | Invitrogen                | A-11057          | 10 µg/mL                     |
| Rat IgG               | Alexa Fluor 647  | Invitrogen                | A-48265          | 10 µg/mL                     |
| Hamster IgG           | Biotin           | Jackson<br>ImmunoResearch | 127-065-160      | Dilution 1/500               |
| Goat IgG              | Alexa Fluor 488  | Invitrogen                | A-11055          | 10 µg/mL                     |
| Rabbit IgG            | Alexa Fluor 488  | Invitrogen                | A-21206          | 10 µg/mL                     |
| Rabbit IgG            | Alexa Fluor 568  | Invitrogen                | A-10042          | 10 µg/mL                     |

**Supplemental Table 1: List of antibodies used for immunostainings**

|                              |   |                                |
|------------------------------|---|--------------------------------|
| mouse 18S                    | F | 5' -CGCGTTCTATTTTGTGGT-3'      |
|                              | R | 5' -AGTCGGCATCGTTTATGGTC-3'    |
| mouse Col1a1                 | F | 5' -CAACCTCAAGAAGGCCCTGC-3'    |
|                              | R | 5' -TGTCCAAGGGAGCCACATCG-3'    |
| mouse Col3a1                 | F | 5' -AGCACGAGGTCTTGCTGGAC-3'    |
|                              | R | 5' -ACCAGCTGTACCAGGCTGAC-3'    |
| mouse Tgfb1                  | F | 5' -GCTAATGGTGGACCGCAACAAC-3'  |
|                              | R | 5' -CACTGCTTCCCGAATGTCTGAC-3'  |
| mouse Myh7                   | F | 5' -GGATGACGTCACCTCCAACA-3'    |
|                              | R | 5' -AGATCAGAGCCTCCTTCTCGT-3'   |
| mouse Ctgf                   | F | 5' -GACCCAATATGATGCGAGCC-3'    |
|                              | R | 5' -TCCCACAGGTCTTAGAACAGG-3'   |
| mouse Ttn N-2B               | F | 5' -ACAGTGGGAAAGCAAAGACATC-3'  |
|                              | R | 5' -AGGTGGCCAGAGCTACTTC-3'     |
| mouse Ttn N2BA               | F | 5' -GAGACATTGCTCCGCTTTTC-3'    |
|                              | R | 5' -GATCTCCAAAGAGGCTGTC-3'     |
| mouse Atp2a2 (Serca2a)       | F | 5' -GATCCTCTACGTGGAACCTTTG-3'  |
|                              | R | 5' -GGTAGATGTGTTGCTAACAAACG-3' |
|                              |   |                                |
| human ACTB ( $\beta$ -actin) | F | 5' -GGAGGAGCTGGAAGCAGCC-3'     |
|                              | R | 5' -GCTGTGCTACGTCGCCCTG-3'     |
| human ICAM-1                 | F | 5' -ACGCCGGAGGACAGGGCATT-3'    |
|                              | R | 5' -GGGGCTATGTCTCCCCACCA-3'    |
| human VCAM-1                 | F | 5' -GGCCCAGTTGAAGGATGCGGG-3'   |
|                              | R | 5' -AGAGCACGAGAAGCTCAGGAGAA-3' |
| human CDH2                   | F | 5' -CCGGTTTCATTTGAGGGCAC-3'    |
|                              | R | 5' -CCCATTGAGGGCATTGGGAT-3'    |
| human IL-6                   | F | 5' -GAAGATTCCAAAGATGTAGCCGC-3' |
|                              | R | 5' -GGTTGTTTTCTGCCAGTGCCCTC-3' |

**Supplemental Table 2: List of primers used for reverse transcription (RT) quantitative polymer chain reaction (qPCR). F: forward; R: reverse**

## Supplemental figures and figure legends

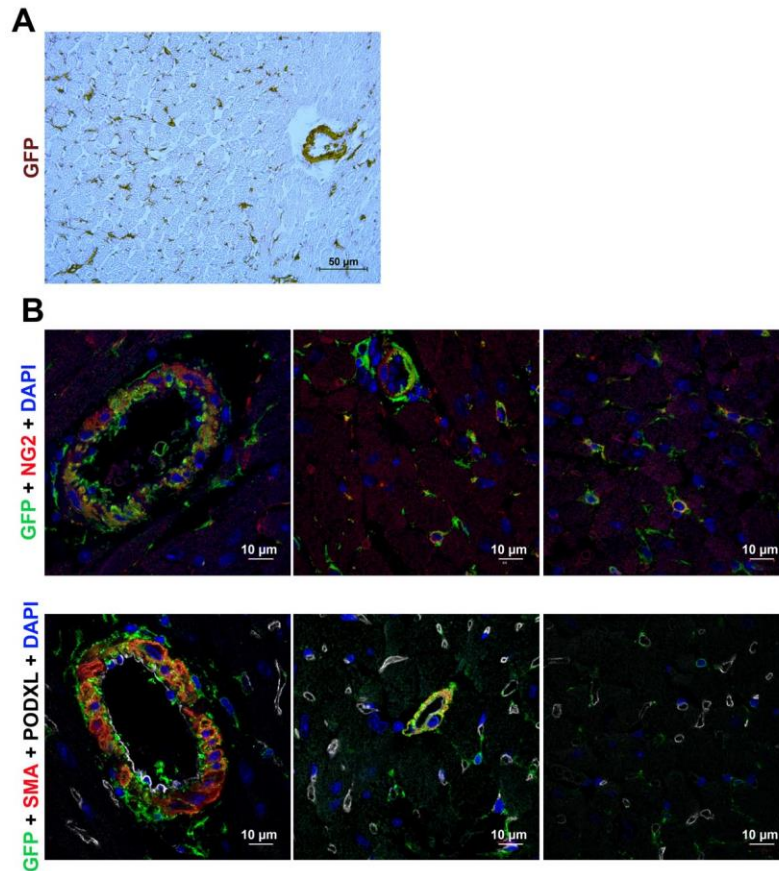

**Supplemental Figure 1: (A-B):** *Pdgfrb-Cre/ERT2; Rosa-mTmG* mice were administered with tamoxifen and sacrificed 7 days after the first injection. **(A)** Heart cross sections were immunostained with anti-GFP antibodies (in brown). **(B)** Heart cross sections were co-immunostained with anti-GFP antibodies (in green) together with anti-NG2 antibodies (in red) to identify pericytes or anti-SMA (in red) and anti-PODXL antibodies (in white) to identify SMCs and endothelial cells respectively.

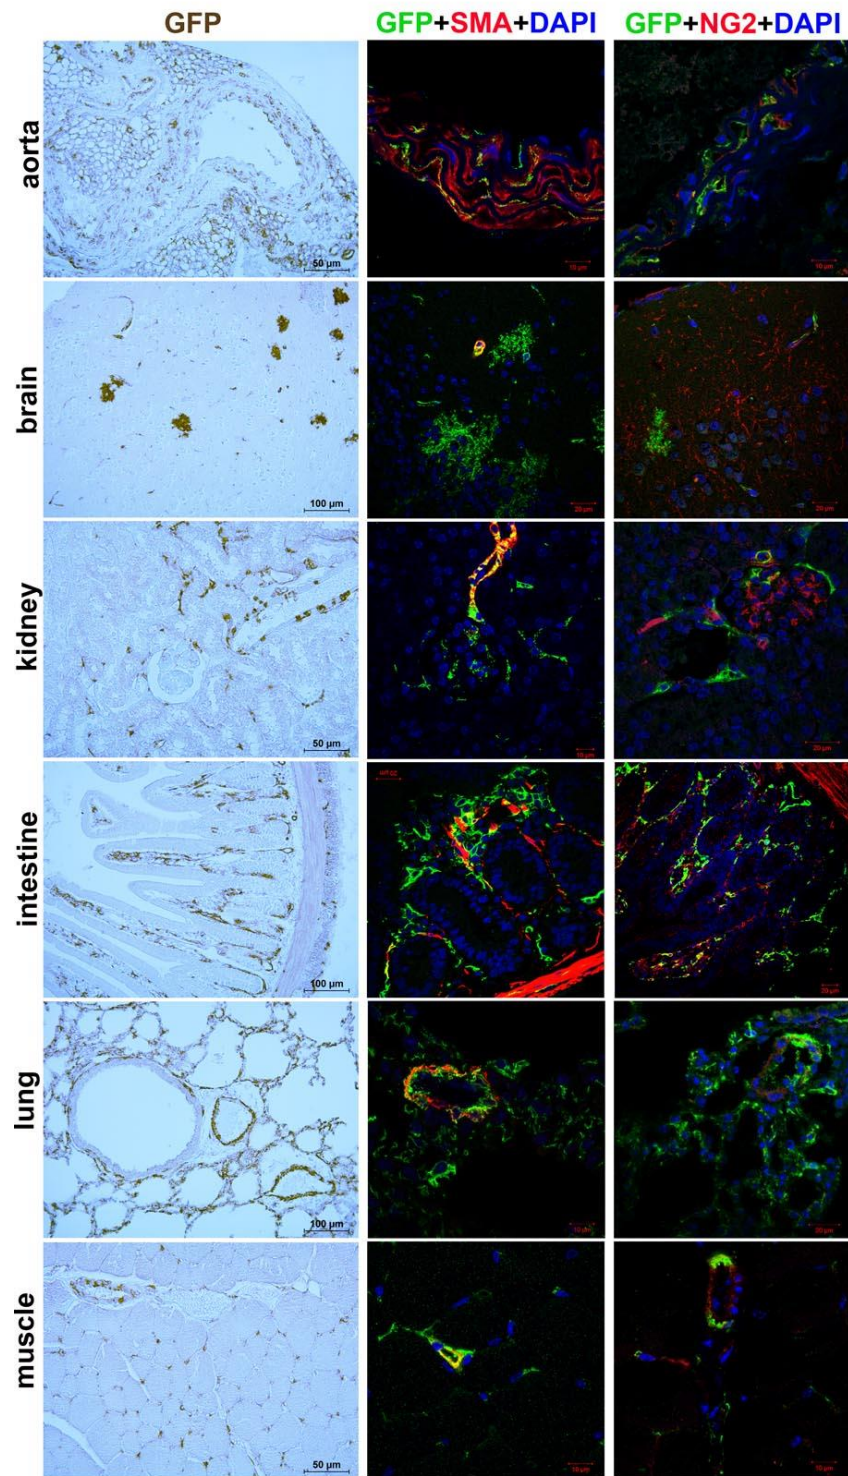

**Supplemental Figure 2:** *Pdgfrb-Cre/ERT2; Rosa-mTmG* mice were administered with tamoxifen and sacrificed 7 days after the first injection. (A) Tissue sections were immunostained with anti-GFP antibodies alone or together with anti-SMA antibodies to identify SMCs or anti-NG2 antibodies to identify pericytes.

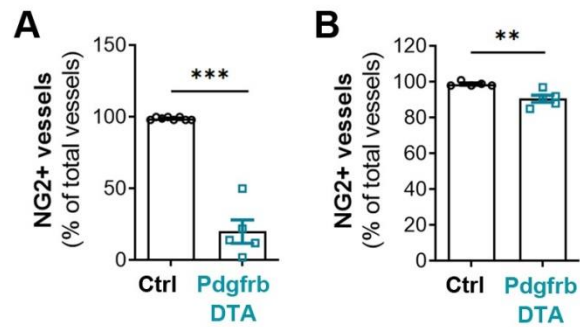

**Supplemental Figure 3:** Pdgfrb-Cre/ERT2; RosaDTA (Pdgfrb-DTA) mice were administered with tamoxifen. Mice were sacrificed 7 days (**A**) or 28 days after the first injection (**B**). Heart cross sections were co-immunostained with anti-NG2 antibodies (in red) together with anti-PODXL antibodies (in green), the percentage of NG2 positive vessel was counted. \*\*:  $p \leq 0.01$ , \*\*\*:  $p \leq 0.001$  (Mann Whitney test).



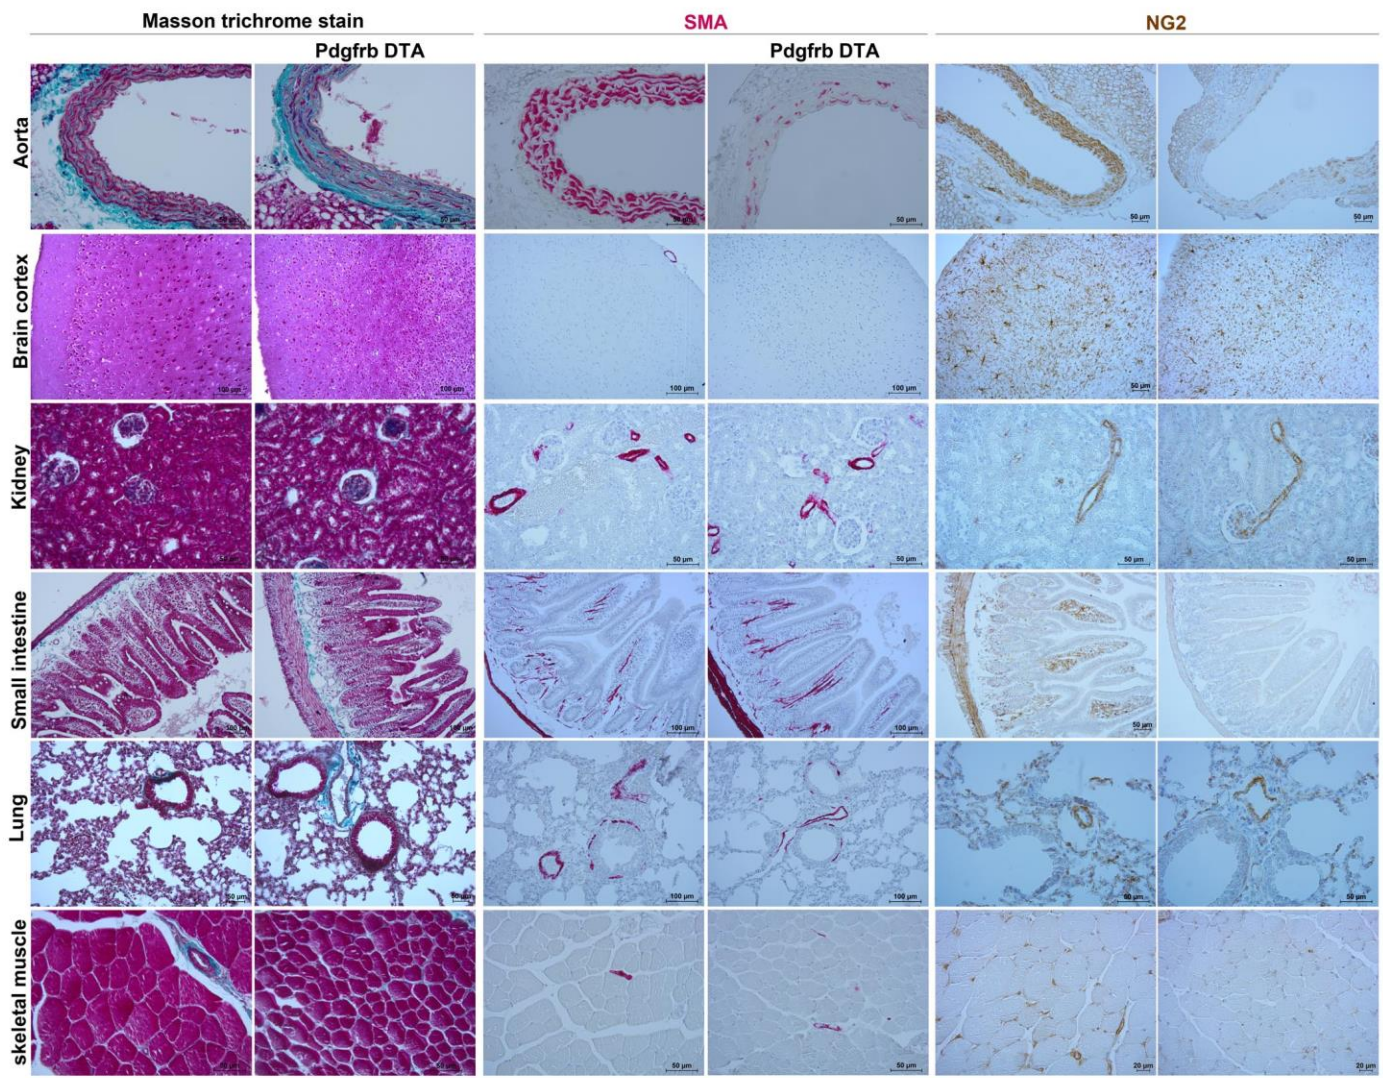

**Supplemental Figure 4:** Pdgfrb-Cre/ERT2; RosaDTA (Pdgfrb-DTA)mice were administered with tamoxifen and sacrificed 28 days after the first injection. Tissues sections were staining with Masson's trichrome stain, anti-SMA or anti-NG2 antibodies.



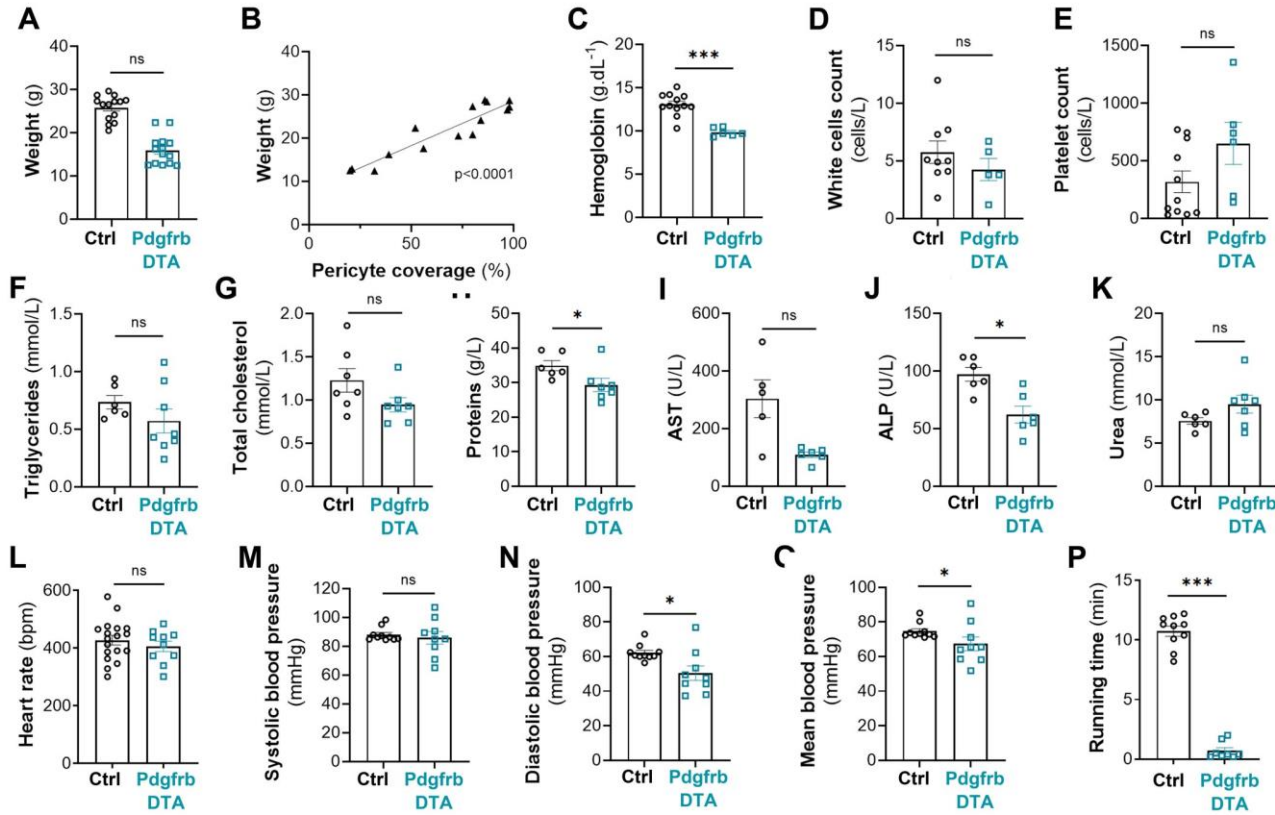

**Supplemental Figure 5:** Pdgrfb-Cre/ERT2; RosaDTA (Pdgrfb-DTA) and RosaDTA (Control) mice were administered with tamoxifen. Mice were sacrificed 28 days after the first injection. (A) The weight of mice was measured and (B) correlated with pericyte coverage. (C) Hemoglobin content, (D) white blood cells count and platelet count (E) was calculated in total blood samples. (F) Triglycerides, (G) total cholesterol, (H) proteins, (I) Aspartate aminotransferase (AST), (J) Alkaline phosphatase (ALP) and (K) urea levels were measured in plasma samples. (L) Heart rate, (M) systolic, (N) diastolic and (O) mean blood pressures were measured via left ventricular catheterization. (P) Exercise tolerance on a treadmill was assessed. \*: p<0.05, \*\*\*: p<0.001, ns: not significant (Mann Whitney test).

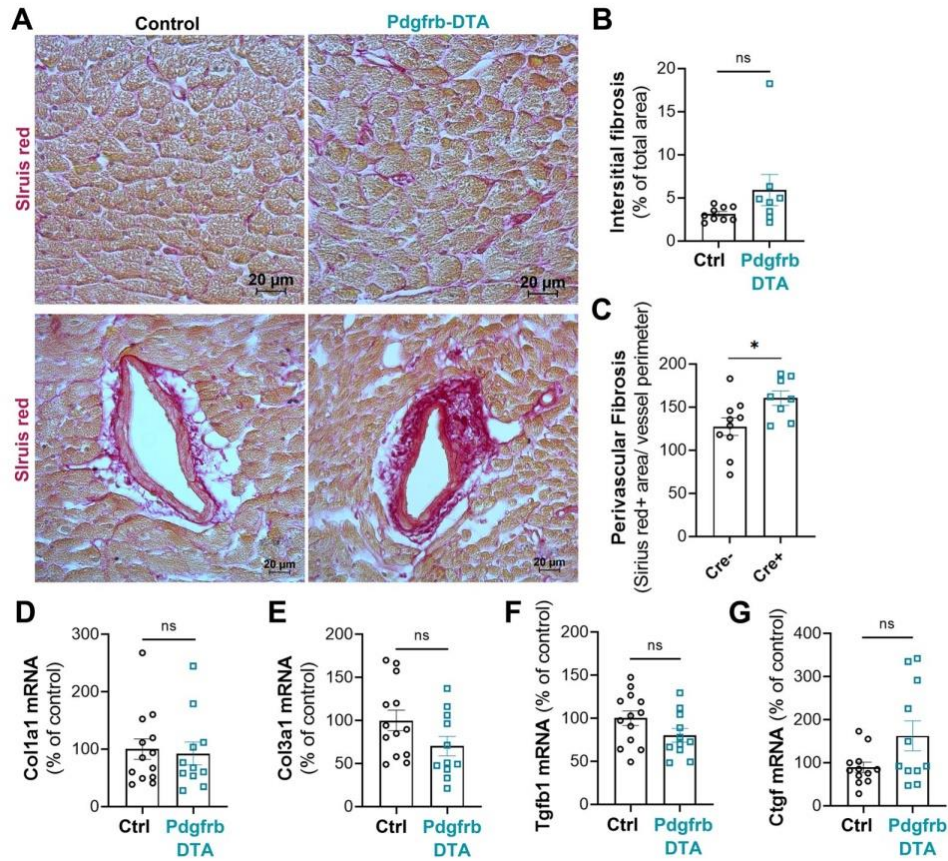

**Supplemental Figure 6:** Pdgfrb-Cre/ERT2; RosaDTA (Pdgfrb-DTA) and RosaDTA (Control) mice were administered with tamoxifen. Mice were sacrificed 28 days after the first injection. **(A)** Heart cross sections were stained with Sirius red to identify fibrosis. **(B)** Interstitial fibrosis was quantified using Image J software (n=9 and 11). **(C)** Perivascular fibrosis was quantified using Image J software (n=9 and 11). Col1a1 (D), Col3a1 (E), Tgfb1 (F) and Ctgf (G) mRNA was quantified by RT-qPCR in total heart extracts and normalized to 18S rRNA. \*:  $p < 0.05$ , ns: not significant (Mann Whitney test).

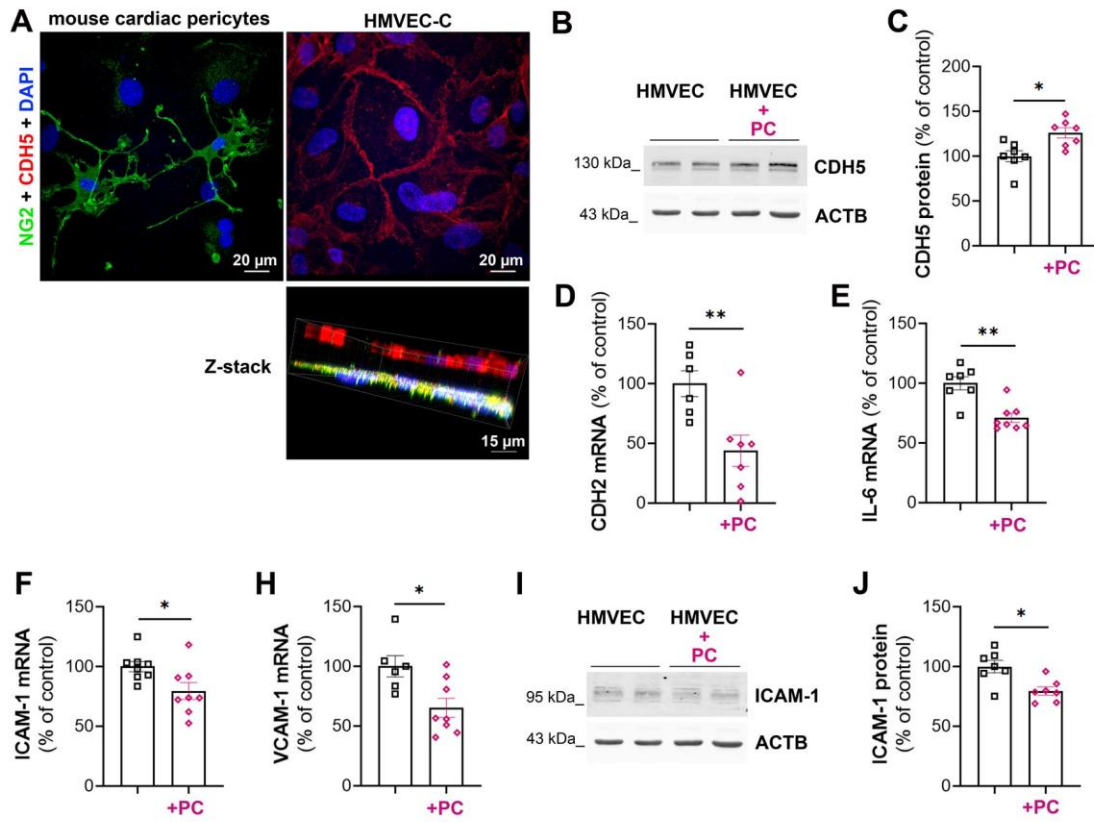

**Supplemental Figure 7:** Cardiac HMVECs were co-cultured or not with mouse cardiac pericyte. Each cell type was plated on each side of a 0.4  $\mu$ m pored Transwell<sup>®</sup> membrane for 48 hours. **(A)** Pericytes were immunostained with anti-NG2 antibodies in green, HMVECs were immunostained with anti-CDH5 antibodies in red. **(B)** CDH5 protein level in HMVECs was evaluated via western blot analysis and **(C)** quantified using Image J software. *CDH2* **(D)**, *IL-6* **(E)**, *ICAM-1* **(F)** and *VCAM-1* **(H)** mRNA levels were quantified via RT-qPCR and normalized to *ACTB* mRNA. **(I)** ICAM-1 protein level in HMVECs was evaluated via western blot analysis and **(J)** quantified using Image J software. \*:  $p \leq 0.05$ , \*\*:  $p \leq 0.01$  (Mann Whitney test).

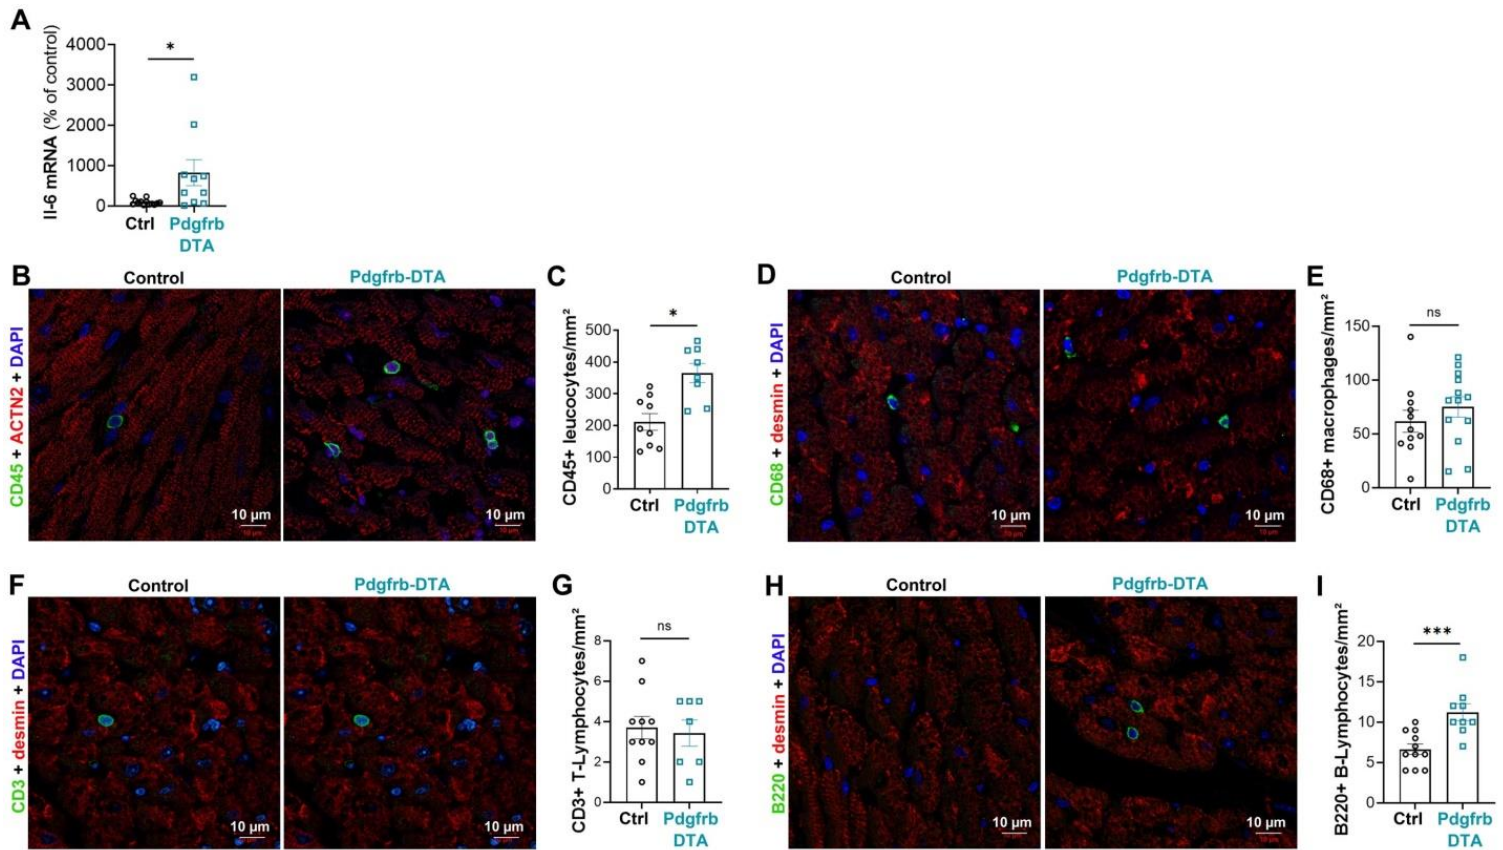

**Supplemental Figure 8:** Pdgrfb-Cre/ERT2; RosaDTA (Pdgrfb-DTA) and RosaDTA (Control) mice were administered with tamoxifen. Mice were sacrificed 28 days after the first injection. **(A)** *Il-6* mRNA level was quantified via RT-qPCR and normalized to 18S rRNA. **(B)** Heart cross sections were co-immunostained with anti-CD45 antibodies (in green) and anti-ACTN2 antibodies (in red). **(C)** The number of CD45 positive leucocytes/mm<sup>2</sup> was quantified using Image J software. **(D)** Heart cross sections were co-immunostained with anti-CD68 antibodies (in green) and anti-desmin antibodies (in red). **(E)** The number of CD68 positive macrophages/mm<sup>2</sup> was quantified using Image J software. **(F)** Heart cross sections were co-immunostained with anti-CD3 antibodies (in green) and anti-desmin antibodies (in red). **(G)** The number of CD3 positive T-lymphocytes/mm<sup>2</sup> was quantified using Image J software. **(H)** Heart cross sections were co-immunostained with anti-B220 antibodies (in green) and anti-desmin antibodies (in red). **(I)** The number of B220 positive B-lymphocytes/mm<sup>2</sup> was quantified using Image J software. \*:  $p \leq 0.05$ , \*\*\*:  $p \leq 0.001$ , ns: not significant (Mann Whitney test).

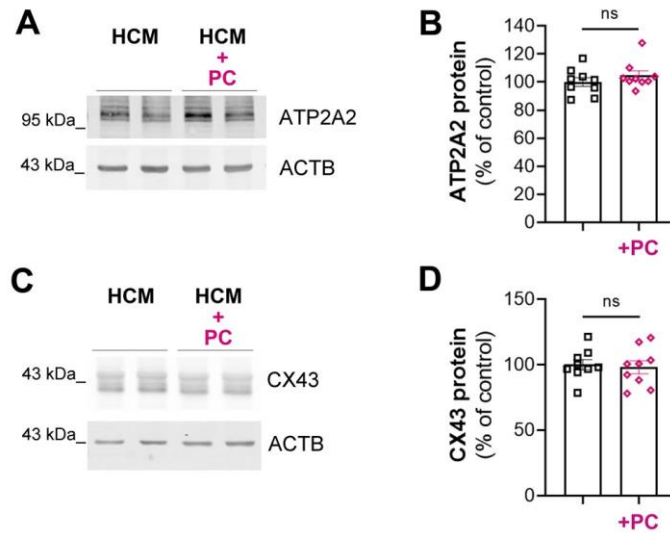

**Supplemental Figure 9:** Human cardiac myocyte (HCM) were co-cultured or not with mouse cardiac pericytes. Each cell type was plated on each side of a 0.4  $\mu$ m pored Transwell<sup>®</sup> membrane for 48 hours. **(A)** ATP2A2 protein level in HCMs was evaluated via western blot analysis and **(B)** quantified using Image J software. **(C)** CX43 protein level in HCMs was evaluated via western blot analysis and **(D)** quantified using Image J software. ns: not significant (Mann Whitney test).
